# Supplementary material for: Clinicopathological Features of Kidney Injury Related to Immune Checkpoint Inhibitors: A Systematic Review
Source: MDPI journal article supplement (doi:10.3390/jcm12041349), 2023-02-08
Supplement: s1 [file s1]

## **Supplementary materials**

**Supplemental Table S1.** PubMed search strategy.

**Supplemental Table S2.** Definition of kidney outcomes of AKD and non-AKD patients

**Supplemental Table S3.** Summary of study characteristics, safety and efficacy of all included case report and case series.

**Supplemental Table S4.** Summary of cohort studies.

**Supplemental Table S5.** The Newcastle-Ottawa scale (NOS) quality assessment of the enrolled studies.

**Supplemental Table S6.** Quality assessment of case/case series.

**Supplemental Table S7.** Risk factors for ICI-associated kidney IRAEs with ATIN/AIN and ATN

**Supplemental Table S8.** Risk factors for ICI-associated kidney IRAEs with glomerular disease and systematic disease

**Supplemental Table S9.** Univariate and multivariable logistic analysis of factors with kidney function recovery in AKD patients

**Supplemental Table S10.** Univariate and multivariable logistic analysis of factors with tumor progression and death

**Supplemental Table S1. PubMed search strategy.**

| # No                                | Searches                                                                                                                                                                                                                                                                                                                             |
|-------------------------------------|--------------------------------------------------------------------------------------------------------------------------------------------------------------------------------------------------------------------------------------------------------------------------------------------------------------------------------------|
| Part I: Immune checkpoint inhibitor |                                                                                                                                                                                                                                                                                                                                      |
| 1                                   | "Programmed Cell Death 1 Receptor"[MeSH Terms] OR "CTLA-4 Antigen"[MeSH Terms]                                                                                                                                                                                                                                                       |
| 2                                   | "anti-PD-1"[Title/Abstract] OR "PD-1"[Title/Abstract] OR "anti-PD-L1"[Title/Abstract] OR "PD-L1"[Title/Abstract] OR "anti pd l 1"[Title/Abstract] OR "pd l 1"[Title/Abstract] OR "CTLA-4"[Title/Abstract] OR "anti-CTLA-4"[Title/Abstract] OR "anti-cytotoxic T-lymphocyte antigen-4"[Title/Abstract]                                |
| 3                                   | "nivolumab"[Title/Abstract] OR "pembrolizumab"[Title/Abstract] OR "atezolizumab"[Title/Abstract] OR "durvalumab"[Title/Abstract] OR "avelumab"[Title/Abstract] OR "ipilimumab"[Title/Abstract] OR "cemiplimab"[Title/Abstract]                                                                                                       |
| 4                                   | "immune checkpoint inhibitor"[Title/Abstract] OR "immune checkpoint inhibitors"[Title/Abstract] OR "ICI"[Title/Abstract] OR "immune checkpoint blockade"[Title/Abstract] OR "ICB"[Title/Abstract])                                                                                                                                   |
| 5                                   | 1 or 2 or 3 or 4                                                                                                                                                                                                                                                                                                                     |
| Part II: Renal adverse events       |                                                                                                                                                                                                                                                                                                                                      |
| 6                                   | ("Acute kidney injury"[All Fields] OR "Nephritis"[Title/Abstract] OR "Amyloidosis"[All Fields] OR "acute tubular necrosis"[Title/Abstract] OR "minimal change disease"[Title/Abstract] OR "Immunoglobulin A nephropathy"[Title/Abstract] OR "Glomerulopathy"[Title/Abstract] OR "acute tubulointerstitial nephritis"[Title/Abstract] |
| 7                                   | "nephrotoxicit*"[Title/Abstract] OR "kidney toxicit*"[Title/Abstract] OR "kidney injur*"[Title/Abstract] OR "renal injur*"[Title/Abstract] OR "renal insufficienc*"[Title/Abstract] OR "kidney insufficienc*"[Title/Abstract] OR "kidney failure*"[Title/Abstract] OR "renal failure*"[Title/Abstract]                               |
| 8                                   | 6 or 7                                                                                                                                                                                                                                                                                                                               |
| Part III : Part I AND II            |                                                                                                                                                                                                                                                                                                                                      |
| 9                                   | 5 and 8                                                                                                                                                                                                                                                                                                                              |

\* means wildcard symbol, For example, "injur\*" means the search would find all the words starting with “injur” including injury, injuries, injured and so on.

**Supplemental Table S2.** Definition of kidney outcomes of AKD and non-AKD patients

---

|                                     |                                                                                                                             |
|-------------------------------------|-----------------------------------------------------------------------------------------------------------------------------|
| Kidney outcomes of AKD patients     |                                                                                                                             |
| Complete recovery                   | last Scr decreased to the baseline <sup>a</sup> or higher than baseline within 26.5 $\mu\text{mol/L}$                       |
| Partial recovery                    | last Scr decreased by 25% or more from peak Scr <sup>b</sup> but remaining higher than baseline over 26.5 $\mu\text{mol/L}$ |
| No recovery                         | last Scr <sup>c</sup> decreased by less than 25% from peak Scr or continue RRT                                              |
| Kidney outcomes of non-AKD patients |                                                                                                                             |
| Proteinuria remission               | $\geq 50\%$ reduction from peak proteinuria according to 24h urine protein quantification                                   |

---

Abbreviations: AKD, acute kidney disease; Scr, serum creatine; RRT, renal replacement treatment.

- a. Baseline SCr was defined as the lowest SCr value before the occurrence of kidney IREAs.
- b. Peak SCr was defined as the highest value reported in the original articles
- c. Last SCr was defined as the last SCr value available in the original articles.

**Supplemental Table S3.** Summary of study characteristics, safety and efficacy of all included case report, case series and conference abstracts.

| Study ID              |      | Sex    | Age | Cancer type  | ICI regimen  | Pathological type    | AKD | AKD stage | Kidney recovery | Tumor response      | Rechallenge | Recurrent |
|-----------------------|------|--------|-----|--------------|--------------|----------------------|-----|-----------|-----------------|---------------------|-------------|-----------|
| Author                | Year |        |     |              |              |                      |     |           |                 |                     |             | irAE      |
| Okamoto, M.           | 2020 | male   | 61  | other        | PD-1         | MN                   | no  | NA        | NA              | NA                  | NA          | NA        |
| Mamlouk, O.           | 2020 | male   | 71  | melanoma     | PD-1+CTLA-4  | MCD, IgA nephropathy | yes | 1         | yes             | complete control    | no          | NA        |
| Narayanankutty, N. P. | 2019 | female | 77  | lung cancer  | PD-1         | AIN                  | yes | 3         | yes             | NA                  | no          | yes       |
| Charmetant, X.        | 2019 | male   | 59  | lung cancer  | PD-1         | AIN                  | no  | NA        | NA              | NA                  | NA          | NA        |
| Marvania, N.          | 2020 | male   | 70  | other        | PD-1         | AIN                  | yes | 3         | yes             | NA                  | NA          | NA        |
| Patel, V.             | 2020 | male   | 71  | renal cancer | PD-1         | AIN                  | yes | 1         | yes             | complete control    | NA          | NA        |
| Patel, V.             | 2020 | male   | 70  | renal cancer | PD-1         | AIN                  | yes | 3         | yes             | partial control     | no          | NA        |
| Patel, V.             | 2020 | male   | 58  | renal cancer | PD-1         | IgA nephropathy      | yes | 3         | yes             | partial control     | no          | NA        |
| Bottlaender, Lea      | 2017 | female | 76  | melanoma     | PD-1         | AIN                  | yes | 2         | yes             | partial control     | yes         | yes       |
| Buyansky, Dimitry     | 2017 | female | 62  | other        | PD-L1        | ATIN                 | yes | 3         | yes             | NA                  | NA          | NA        |
| Mulroy, M.            | 2021 | female | 79  | melanoma     | PD-1         | AIN                  | yes | 3         | yes             | complete control    | no          | NA        |
| Oleas, Diana          | 2021 | female | 59  | lung cancer  | PD-L1+CTLA-4 | AIN                  | yes | 3         | yes             | progressive disease | NA          | NA        |
| Oleas, Diana          | 2021 | female | 67  | other        | PD-L1        | AIN                  | yes | 3         | yes             | progressive disease | NA          | NA        |
| Oleas, Diana          | 2021 | female | 83  | melanoma     | PD-1         | AIN                  | yes | 3         | yes             | complete control    | NA          | NA        |
| Oleas, Diana          | 2021 | male   | 85  | lung cancer  | PD-1         | AIN                  | yes | 1         | yes             | progressive disease | NA          | NA        |
| Oleas, Diana          | 2021 | female | 68  | lung cancer  | PD-1         | AIN                  | yes | 2         | yes             | stable              | NA          | NA        |
| Oleas, Diana          | 2021 | male   | 63  | lung cancer  | PD-L1        | AIN                  | yes | 3         | no              | partial control     | NA          | NA        |

**Supplemental Table S3. (continued)**

|                   |      |        |    |                       |        |          |     |    |     |                        |    |    |
|-------------------|------|--------|----|-----------------------|--------|----------|-----|----|-----|------------------------|----|----|
| Oleas, Diana      | 2021 | male   | 75 | melanoma              | PD-1   | AIN      | yes | 3  | yes | complete control       | NA | NA |
| Oleas, Diana      | 2021 | male   | 61 | lung cancer           | PD-1   | AIN      | yes | 3  | yes | progressive<br>disease | NA | NA |
| Georgianos, P. I. | 2019 | male   | 60 | lung cancer           | PD-1   | AIN      | yes | 3  | yes | NA                     | no | NA |
| Belliere, J.      | 2016 | female | 67 | lung cancer           | PD-1   | AIN      | yes | 3  | yes | NA                     | NA | NA |
| Belliere, J.      | 2016 | female | 52 | melanoma              | PD-1   | AIN      | yes | 2  | yes | NA                     | NA | NA |
| Belliere, J.      | 2016 | female | 68 | melanoma              | CTLA-4 | AIN      | yes | 1  | yes | NA                     | NA | NA |
| Ryuzaki, M.       | 2019 | male   | 76 | other                 | PD-1   | ATIN     | yes | 3  | yes | NA                     | no | NA |
| Ryuzaki, M.       | 2019 | female | 76 | lung cancer           | PD-1   | AIN      | yes | 2  | yes | NA                     | NA | NA |
| Meraz-Muñoz, A.   | 2020 | male   | 55 | melanoma              | NA     | TMA      | yes | 1  | NA  | NA                     | NA | NA |
| Meraz-Muñoz, A.   | 2020 | female | 56 | melanoma              | NA     | TMA      | yes | 3  | NA  | NA                     | NA | NA |
| Meraz-Muñoz, A.   | 2020 | female | 63 | melanoma              | NA     | AIN      | yes | 1  | NA  | NA                     | NA | NA |
| Meraz-Muñoz, A.   | 2020 | male   | 68 | melanoma              | NA     | AIN      | yes | 3  | NA  | NA                     | NA | NA |
| Meraz-Muñoz, A.   | 2020 | male   | 69 | melanoma              | NA     | AIN      | yes | 2  | NA  | NA                     | NA | NA |
| Meraz-Muñoz, A.   | 2020 | male   | 76 | melanoma              | NA     | AIN      | yes | 1  | NA  | NA                     | NA | NA |
| Meraz-Muñoz, A.   | 2020 | male   | 66 | melanoma              | NA     | AIN      | yes | 3  | NA  | NA                     | NA | NA |
| Meraz-Muñoz, A.   | 2020 | male   | 42 | hematologic<br>cancer | NA     | ATN, MCD | yes | 3  | NA  | NA                     | NA | NA |
| Meraz-Muñoz, A.   | 2020 | male   | 72 | other                 | NA     | AIN      | yes | 1  | NA  | NA                     | NA | NA |
| Meraz-Muñoz, A.   | 2020 | male   | 45 | melanoma              | NA     | MCD      | no  | NA | NA  | NA                     | NA | NA |
| Meraz-Muñoz, A.   | 2020 | female | 53 | other                 | NA     | MN       | no  | NA | NA  | NA                     | NA | NA |
| Meraz-Muñoz, A.   | 2020 | male   | 39 | other                 | NA     | MN       | no  | NA | NA  | NA                     | NA | NA |

**Supplemental Table S3. (continued)**

|                     |      |        |    |              |             |                                           |     |    |     |                        |     |    |
|---------------------|------|--------|----|--------------|-------------|-------------------------------------------|-----|----|-----|------------------------|-----|----|
| Catapano, F.        | 2021 | female | 52 | melanoma     | PD-1        | ATIN                                      | yes | NA | yes | NA                     | NA  | NA |
| Gordon, L.          | 2019 | male   | 67 | melanoma     | PD-1+CTLA-4 | AIN                                       | yes | 3  | yes | NA                     | no  | NA |
| Panthofer, A. M.    | 2020 | female | 73 | melanoma     | PD-1        | TMA, Acute antibody<br>mediated rejection | yes | 3  | no  | NA                     | yes | NA |
| Irifuku, T.         | 2020 | male   | 59 | renal cancer | PD-1        | ATIN, GN                                  | yes | 2  | yes | stable                 | no  | NA |
| Xipell, M.          | 2018 | male   | 54 | renal cancer | PD-L1       | ATIN                                      | yes | 3  | yes | partial control        | no  | NA |
| Basnet, S.          | 2019 | female | 62 | lung cancer  | PD-1        | ATIN                                      | yes | 3  | yes | progressive<br>disease | no  | NA |
| Uner, M.            | 2021 | male   | 65 | other        | PD-1        | AASV                                      | yes | 3  | yes | NA                     | no  | NA |
| Jolly, E. C.        | 2009 | male   | 41 | melanoma     | CTLA4       | AIN                                       | yes | 3  | yes | progressive<br>disease | no  | NA |
| Sammartino, C.      | 2010 | male   | 50 | melanoma     | CTLA-4      | anti-GBM disease                          | yes | 3  | no  | NA                     | no  | NA |
| Noto-Kadou-Kaza, B. | 2021 | female | 71 | renal cancer | PD-1        | AIN                                       | yes | 3  | yes | NA                     | NA  | NA |
| Shirali, A. C.      | 2016 | male   | 73 | lung cancer  | PD-1        | AIN                                       | yes | 1  | yes | progressive<br>disease | no  | NA |
| Shirali, A. C.      | 2017 | male   | 78 | lung cancer  | PD-1        | AIN                                       | yes | 2  | yes | NA                     | NA  | NA |
| Shirali, A. C.      | 2018 | female | 60 | lung cancer  | PD-1        | AIN                                       | yes | 3  | yes | stable                 | no  | NA |
| Shirali, A. C.      | 2019 | female | 69 | lung cancer  | PD-1        | AIN                                       | yes | 2  | yes | NA                     | no  | NA |
| Shirali, A. C.      | 2020 | male   | 59 | lung cancer  | PD-1+CTLA-4 | AIN                                       | yes | 3  | yes | NA                     | no  | NA |
| Shirali, A. C.      | 2021 | female | 69 | lung cancer  | PD-1        | AIN                                       | yes | 2  | yes | NA                     | NA  | NA |
| Izzedine, H.        | 2014 | male   | 70 | renal cancer | PD-L1       | TMA                                       | yes | 1  | yes | NA                     | no  | NA |
| Izzedine, H.        | 2014 | male   | 72 | renal cancer | PD-L1       | TMA                                       | yes | 1  | no  | NA                     | no  | NA |

**Supplemental Table S3. (continued)**

|                         |      |        |    |                       |             |                                      |     |   |     |                        |     |    |
|-------------------------|------|--------|----|-----------------------|-------------|--------------------------------------|-----|---|-----|------------------------|-----|----|
| Martínez Valenzuela, L. | 2021 | male   | 70 | lung cancer           | PD-1        | ATIN                                 | yes | 3 | yes | complete control       | no  | NA |
| Martínez Valenzuela, L. | 2021 | male   | 80 | melanoma              | PD-1        | ATIN                                 | yes | 3 | yes | NA                     | no  | NA |
| Martínez Valenzuela, L. | 2021 | female | 60 | renal cancer          | PD-1        | ATIN                                 | yes | 3 | yes | progressive<br>disease | no  | NA |
| Chemaly, E. R.          | 2020 | female | 26 | hematologic<br>cancer | PD-1        | AIN, MCD                             | yes | 2 | yes | progressive<br>disease | no  | NA |
| Chua, J.                | 2020 | male   | 77 | other                 | PD-1        | ATIN                                 | yes | 3 | no  | NA                     | NA  | NA |
| George, S.              | 2019 | male   | 27 | other                 | PD-1+CTLA-4 | GN                                   | yes | 3 | yes | NA                     | NA  | NA |
| Mamlouk, O.             | 2020 | male   | 40 | lung cancer           | PD-1        | FSGS                                 | yes | 3 | yes | progressive<br>disease | NA  | NA |
| Mamlouk, O.             | 2020 | male   | 70 | renal cancer          | PD-1        | FSGS                                 | yes | 2 | yes | progressive<br>disease | no  | NA |
| Mamlouk, O.             | 2020 | female | 60 | melanoma              | PD-1+CTLA-4 | vasculitis                           | yes | 3 | yes | NA                     | NA  | NA |
| Mamlouk, O.             | 2020 | male   | 60 | other                 | PD-1        | ATN, FSGS                            | yes | 3 | yes | NA                     | NA  | NA |
| Mamlouk, O.             | 2020 | female | 50 | melanoma              | PD-1+CTLA-4 | vasculitis                           | yes | 3 | yes | stable                 | no  | NA |
| Mamlouk, O.             | 2019 | male   | 40 | melanoma              | PD-1+CTLA-4 | Acute antibody mediated<br>rejection | yes | 3 | no  | NA                     | yes | NA |
| Aratani, S.             | 2021 | male   | 78 | lung cancer           | PD-1        | ATIN                                 | yes | 3 | yes | NA                     | no  | NA |
| Aratani, S.             | 2021 | male   | 73 | lung cancer           | PD-1        | ATIN                                 | yes | 2 | yes | NA                     | no  | NA |
| Aratani, S.             | 2021 | male   | 66 | lung cancer           | PD-1        | AIN                                  | yes | 3 | yes | NA                     | no  | NA |
| Aratani, S.             | 2021 | male   | 52 | lung cancer           | PD-1        | ATIN                                 | yes | 1 | yes | NA                     | no  | NA |
| Cortazar, F. B.         | 2016 | male   | 70 | melanoma              | CTLA-4      | AIN                                  | yes | 3 | yes | NA                     | yes | no |

**Supplemental Table S3. (continued)**

|                 |      |        |    |                       |             |               |     |   |     |                        |     |     |
|-----------------|------|--------|----|-----------------------|-------------|---------------|-----|---|-----|------------------------|-----|-----|
| Cortazar, F. B. | 2016 | male   | 64 | melanoma              | PD-1+CTLA-4 | AIN           | yes | 3 | yes | NA                     | no  | NA  |
| Cortazar, F. B. | 2016 | male   | 74 | melanoma              | PD-1+CTLA-4 | AIN           | yes | 3 | yes | NA                     | no  | NA  |
| Cortazar, F. B. | 2016 | female | 62 | melanoma              | CTLA-4      | AIN           | yes | 3 | no  | NA                     | no  | NA  |
| Cortazar, F. B. | 2016 | female | 71 | lung cancer           | PD-1+CTLA-4 | AIN           | yes | 3 | yes | NA                     | no  | NA  |
| Cortazar, F. B. | 2016 | male   | 64 | other                 | CTLA-4      | AIN           | yes | 3 | no  | NA                     | no  | NA  |
| Cortazar, F. B. | 2016 | male   | 71 | melanoma              | PD-1        | AIN           | yes | 3 | yes | NA                     | yes | yes |
| Cortazar, F. B. | 2016 | male   | 58 | melanoma              | CTLA-4      | TMA           | yes | 3 | no  | NA                     | no  | NA  |
| Cortazar, F. B. | 2016 | male   | 75 | melanoma              | PD-1+CTLA-4 | AIN           | yes | 3 | yes | NA                     | no  | NA  |
| Cortazar, F. B. | 2016 | female | 32 | hematologic<br>cancer | CTLA-4      | AIN           | yes | 2 | no  | NA                     | yes | no  |
| Cortazar, F. B. | 2016 | female | 73 | melanoma              | CTLA-4      | AIN           | yes | 3 | yes | NA                     | no  | NA  |
| Cortazar, F. B. | 2016 | male   | 66 | other                 | PD-1        | AIN           | yes | 3 | yes | NA                     | no  | NA  |
| Cortazar, F. B. | 2016 | female | 41 | melanoma              | PD-1        | AIN           | yes | 2 | yes | NA                     | no  | NA  |
| Pampols, P. A.  | 2020 | male   | 70 | lung cancer           | PD-1        | ATIN          | yes | 3 | yes | NA                     | NA  | NA  |
| Pampols, P. A.  | 2020 | male   | 82 | melanoma              | PD-1        | ATIN          | yes | 3 | yes | NA                     | NA  | NA  |
| Pampols, P. A.  | 2020 | female | 63 | renal cancer          | PD-1        | ATIN          | yes | 3 | yes | NA                     | NA  | NA  |
| Abramson, M.    | 2020 | male   | 67 | lung cancer           | PD-1        | crescentic GN | yes | 3 | yes | stable                 | no  | NA  |
| Gebauer, E.     | 2021 | male   | 72 | melanoma              | PD-1+CTLA-4 | ATIN          | yes | 3 | yes | progressive<br>disease | no  | NA  |
| Sise, M. E.     | 2019 | male   | 60 | melanoma              | PD-1        | AIN           | yes | 3 | yes | stable                 | yes | yes |
| Lo, W. K.       | 2020 | female | 85 | other                 | PD-1+CTLA-4 | GN            | yes | 2 | yes | NA                     | no  | NA  |
| Lo, W. K.       | 2020 | male   | 67 | other                 | PD-1+CTLA-4 | GN            | yes | 2 | yes | NA                     | no  | NA  |



**Supplemental Table S3. (continued)**

|                  |      |        |    |              |             |                      |     |    |     |                  |    |    |
|------------------|------|--------|----|--------------|-------------|----------------------|-----|----|-----|------------------|----|----|
| Lo, W. K.        | 2020 | male   | 74 | renal cancer | PD-1        | AIN, GN              | yes | 3  | yes | NA               | no | NA |
| Takahashi, N.    | 2018 | male   | 74 | lung cancer  | PD-1        | anti-GBM disease     | yes | 3  | no  | stable           | NA | NA |
| Sebastian Hultin | 2020 | male   | NA | melanoma     | PD-1+CTLA-4 | anti-GBM disease     | yes | NA | NA  | complete control | NA | NA |
| Sebastian Hultin | 2020 | male   | NA | melanoma     | PD-1+CTLA-4 | ATIN                 | yes | NA | NA  | NA               | NA | NA |
| Sebastian Hultin | 2020 | male   | NA | melanoma     | PD-1+CTLA-4 | ATIN                 | yes | NA | NA  | NA               | NA | NA |
| Sebastian Hultin | 2020 | male   | NA | melanoma     | PD-1+CTLA-4 | ATIN                 | yes | NA | NA  | NA               | NA | NA |
| Sebastian Hultin | 2020 | male   | NA | melanoma     | PD-1+CTLA-4 | ATIN                 | yes | NA | NA  | NA               | NA | NA |
| Sebastian Hultin | 2020 | male   | NA | melanoma     | PD-1        | ATIN                 | yes | NA | NA  | NA               | NA | NA |
| Sebastian Hultin | 2020 | male   | NA | melanoma     | PD-1+CTLA-4 | ATIN                 | yes | NA | NA  | NA               | NA | NA |
| Sebastian Hultin | 2020 | male   | NA | melanoma     | PD-1+CTLA-4 | ATIN                 | yes | NA | NA  | NA               | NA | NA |
| Sebastian Hultin | 2020 | male   | NA | melanoma     | PD-1+CTLA-4 | ATIN                 | yes | NA | NA  | NA               | NA | NA |
| Sebastian Hultin | 2020 | female | NA | melanoma     | PD-1+CTLA-4 | ATIN                 | yes | NA | NA  | NA               | NA | NA |
| Sebastian Hultin | 2020 | male   | NA | melanoma     | PD-1+CTLA-4 | ATIN                 | yes | NA | NA  | NA               | NA | NA |
| Sebastian Hultin | 2020 | male   | NA | melanoma     | PD-1        | ATIN                 | yes | NA | NA  | NA               | NA | NA |
| Tawhari, I.      | 2020 | male   | 67 | melanoma     | PD-1+CTLA-4 | ATIN                 | yes | 3  | yes | NA               | no | NA |
| Leuprecht, L.    | 2020 | male   | 62 | other        | PD-1+CTLA-4 | AIN, IgA nephropathy | yes | 3  | yes | NA               | NA | NA |
| Bobart, S.       | 2020 | male   | 87 | other        | PD-1        | vasculitis           | yes | 3  | yes | NA               | no | NA |
| Mohan, S.        | 2018 | male   | 67 | melanoma     | PD-1+CTLA-4 | vasculitis           | yes | 3  | yes | NA               | NA | NA |
| Savedchuk, S.    | 2019 | male   | 67 | renal cancer | PD-1        | AIN                  | yes | 3  | yes | NA               | NA | NA |
| Koda, R.         | 2018 | male   | 67 | lung cancer  | PD-1        | ATIN                 | yes | 2  | yes | stable           | no | NA |
| Tadros, M. G.    | 2019 | female | 70 | lung cancer  | PD-1        | AIN                  | yes | 3  | yes | NA               | NA | NA |
| Montanez, M.     | 2020 | female | 52 | lung cancer  | PD-1        | AASV                 | yes | 3  | yes | complete control | NA | NA |

**Supplemental Table S3. (continued)**

|                       |      |        |    |                       |             |         |     |    |     |                        |     |     |
|-----------------------|------|--------|----|-----------------------|-------------|---------|-----|----|-----|------------------------|-----|-----|
| Lin, J.               | 2020 | male   | 62 | melanoma              | PD-1+CTLA-4 | ATIN    | yes | 3  | yes | NA                     | NA  | NA  |
| Lapman, S.            | 2020 | male   | 42 | other                 | PD-1        | ATN, AA | yes | 1  | no  | complete control       | NA  | NA  |
| Lapman, S.            | 2020 | male   | 75 | other                 | PD-1        | AA      | no  | NA | NA  | partial control        | NA  | NA  |
| Lapman, S.            | 2020 | male   | 81 | melanoma              | PD-1        | AA      | yes | 3  | no  | complete control       | NA  | NA  |
| Duque, J.             | 2018 | male   | 52 | other                 | PD-1+CTLA4  | AIN     | yes | NA | yes | NA                     | NA  | NA  |
| Baradhi, K. M.        | 2018 | female | 82 | lung cancer           | PD-1        | ATIN    | yes | NA | yes | NA                     | NA  | NA  |
| Leger, K.             | 2019 | male   | 49 | renal cancer          | PD-1        | GN      | yes | 1  | no  | progressive<br>disease | no  | NA  |
| Parza, K.             | 2021 | male   | 73 | melanoma              | PD-1+CTLA-4 | ATIN    | yes | 3  | yes | NA                     | no  | NA  |
| Lin, J. S.            | 2021 | female | 69 | other                 | PD-L1       | ATIN    | yes | 3  | yes | NA                     | NA  | NA  |
| Lin, J. S.            | 2021 | male   | 67 | melanoma              | PD-1+CTLA-4 | ATIN    | yes | 3  | yes | partial control        | NA  | NA  |
| Lin, J. S.            | 2021 | male   | 76 | melanoma              | PD-1+CTLA-4 | ATIN    | yes | 2  | yes | complete control       | NA  | NA  |
| Lin, J. S.            | 2021 | female | 64 | other                 | PD-1        | ATIN    | yes | 3  | yes | stable                 | NA  | NA  |
| Lin, J. S.            | 2021 | male   | 72 | other                 | PD-L1       | ATN     | yes | 3  | yes | progressive<br>disease | NA  | NA  |
| Lin, J. S.            | 2021 | male   | 77 | lung cancer           | PD-1        | ATN     | yes | 2  | yes | progressive<br>disease | yes | yes |
| Lin, J. S.            | 2021 | male   | 77 | other                 | PD-1        | ATIN    | yes | 3  | yes | progressive<br>disease | NA  | NA  |
| Lin, J. S.            | 2021 | female | 52 | lung cancer           | PD-1        | ATIN    | yes | 1  | no  | stable                 | no  | NA  |
| de Sousa Oliveira, D. | 2019 | female | 19 | hematologic<br>cancer | PD-1        | AIN     | no  | NA | NA  | partial control        | yes | no  |

**Supplemental Table S3. (continued)**

|                    |      |        |    |                       |             |               |     |    |     |                        |     |     |
|--------------------|------|--------|----|-----------------------|-------------|---------------|-----|----|-----|------------------------|-----|-----|
| Oliveira, D. S.    | 2019 | female | 19 | hematologic<br>cancer | PD-1        | AIN           | no  | NA | NA  | progressive<br>disease | yes | no  |
| Escandon, J.       | 2017 | male   | 64 | melanoma              | PD-1        | ATIN          | yes | 3  | yes | progressive<br>disease | yes | no  |
| Escandon, J.       | 2017 | female | 78 | melanoma              | PD-1        | ATIN          | yes | 3  | yes | NA                     | no  | NA  |
| Nagaraju, G.       | 2018 | female | 54 | melanoma              | PD-1        | AIN           | yes | NA | yes | complete control       | no  | NA  |
| Thajudeen, B.      | 2015 | male   | 74 | melanoma              | CTLA-4      | AIN           | yes | 2  | yes | NA                     | yes | no  |
| Kidd, J. M.        | 2016 | male   | 55 | melanoma              | CTLA-4      | MCD           | yes | 3  | yes | NA                     | NA  | NA  |
| Lemoine, M.        | 2019 | male   | 70 | melanoma              | CTLA-4      | vasculitis    | yes | 3  | yes | progressive<br>disease | no  | NA  |
| Izzedine, H.       | 2021 | male   | 78 | melanoma              | CTLA-4      | AIN           | yes | 3  | yes | partial control        | NA  | NA  |
| Izzedine, H.       | 2021 | female | 60 | melanoma              | CTLA-4      | AIN           | yes | NA | yes | NA                     | NA  | NA  |
| Cruz-Whitley, J.   | 2020 | female | 75 | hematologic<br>cancer | PD-1        | crescentic GN | yes | 1  | yes | progressive<br>disease | no  | NA  |
| Jensen, C.         | 2019 | male   | 20 | other                 | PD-1+CTLA-4 | MN            | no  | NA | NA  | NA                     | NA  | NA  |
| Meraz-Munoz, A. Y. | 2019 | female | 52 | other                 | PD-1        | MN            | no  | NA | NA  | NA                     | yes | yes |
| Meraz-Munoz, A. Y. | 2019 | male   | 39 | other                 | PD-1        | MN            | no  | NA | NA  | NA                     | NA  | NA  |
| Gao, B.            | 2018 | male   | 40 | hematologic<br>cancer | PD-L1       | MCD           | no  | NA | NA  | NA                     | no  | NA  |
| Toda, M. G.        | 2021 | male   | 75 | lung cancer           | PD-1        | MCD           | no  | NA | NA  | NA                     | NA  | NA  |
| Vaughan, E.        | 2020 | male   | 57 | other                 | PD-1        | MCD           | yes | 2  | no  | progressive<br>disease | no  | NA  |

**Supplemental Table S3. (continued)**

|              |      |        |    |                       |             |                       |     |    |     |                        |     |     |
|--------------|------|--------|----|-----------------------|-------------|-----------------------|-----|----|-----|------------------------|-----|-----|
| Makati, D.   | 2018 | female | 66 | melanoma              | PD-1+CTLA-4 | AIN                   | yes | 3  | yes | NA                     | no  | NA  |
| Messias, Ana | 2019 | male   | 52 | melanoma              | PD-1        | ATIN                  | yes | 3  | no  | progressive<br>disease | no  | NA  |
| Kitchlu, A.  | 2017 | male   | 43 | hematologic<br>cancer | PD-1        | MCD                   | yes | 3  | yes | progressive<br>disease | no  | NA  |
| Kitchlu, A.  | 2017 | male   | 45 | melanoma              | CTLA-4      | MCD                   | no  | NA | NA  | progressive<br>disease | yes | yes |
| Omar Mamlouk | 2019 | male   | 75 | renal cancer          | PD-1        | ATIN, AASV            | yes | 2  | NA  | stable                 | NA  | NA  |
| Omar Mamlouk | 2019 | female | 69 | melanoma              | PD-1+CTLA-4 | vasculitis            | yes | 3  | NA  | stable                 | NA  | NA  |
| Omar Mamlouk | 2019 | male   | 69 | melanoma              | PD-1+CTLA-4 | ATIN, IgA nephropathy | yes | 1  | NA  | stable                 | NA  | NA  |
| Omar Mamlouk | 2019 | female | 50 | melanoma              | PD-1        | FSGS, IgA nephropathy | yes | 3  | NA  | progressive<br>disease | NA  | NA  |
| Omar Mamlouk | 2019 | female | 60 | renal cancer          | PD-1        | MN                    | yes | NA | NA  | progressive<br>disease | NA  | NA  |
| Omar Mamlouk | 2019 | female | 61 | hematologic<br>cancer | PD-1        | ATIN, GN              | yes | 3  | NA  | stable                 | NA  | NA  |
| Omar Mamlouk | 2019 | male   | 74 | hematologic<br>cancer | PD-1        | ATIN, FSGS            | yes | 1  | NA  | progressive<br>disease | NA  | NA  |
| Omar Mamlouk | 2019 | male   | 63 | other                 | PD-1        | ATN, AA               | yes | 3  | NA  | progressive<br>disease | NA  | NA  |
| Omar Mamlouk | 2019 | male   | 41 | lung cancer           | PD-1        | vasculitis            | yes | 3  | NA  | progressive<br>disease | NA  | NA  |

**Supplemental Table S3. (continued)**

|                 |      |        |    |              |       |                 |     |    |     |                        |     |    |
|-----------------|------|--------|----|--------------|-------|-----------------|-----|----|-----|------------------------|-----|----|
| Omar Mamlouk    | 2019 | male   | 74 | other        | PD-1  | AIN             | yes | 3  | yes | partial control        | NA  | NA |
| Omar Mamlouk    | 2019 | male   | 77 | other        | PD-1  | ATIN            | yes | 3  | yes | stable                 | NA  | NA |
| Omar Mamlouk    | 2019 | male   | 58 | lung cancer  | PD-1  | ATN             | yes | 3  | yes | stable                 | NA  | NA |
| Omar Mamlouk    | 2019 | male   | 65 | other        | PD-1  | ATN             | yes | 3  | NA  | progressive<br>disease | NA  | NA |
| Omar Mamlouk    | 2019 | male   | 68 | melanoma     | PD-1  | ATIN            | yes | 3  | NA  | stable                 | NA  | NA |
| Omar Mamlouk    | 2019 | male   | 55 | other        | PD-L1 | ATIN            | yes | 1  | NA  | progressive<br>disease | NA  | NA |
| Jung, Kyungsuk  | 2016 | male   | 70 | renal cancer | PD-1  | ATN, GN         | yes | 3  | yes | partial control        | no  | NA |
| Ai, Luoyan      | 2021 | male   | 72 | other        | PD-1  | AIN             | yes | 3  | yes | complete control       | no  | NA |
| Shim, J.        | 2021 | male   | 68 | other        | PD-1  | GN              | yes | 2  | yes | progressive<br>disease | yes | no |
| Daanen, R. A.   | 2017 | male   | 62 | renal cancer | PD-1  | FSGS            | yes | 3  | yes | progressive<br>disease | no  | NA |
| Nakatani, Y.    | 2018 | female | 68 | other        | PD-1  | ATIN            | yes | 3  | yes | NA                     | yes | no |
| Tanabe, K.      | 2020 | male   | 78 | other        | PD-1  | IgA nephropathy | yes | 2  | no  | progressive<br>disease | no  | NA |
| Wakabayashi, K. | 2021 | male   | 69 | lung cancer  | PD-1  | MN              | no  | NA | NA  | stable                 | no  | NA |
| Hninn, W. Y.    | 2019 | male   | 65 | other        | PD-1  | AASV            | yes | 3  | yes | NA                     | NA  | NA |
| Leonard, D.     | 2015 | male   | 63 | melanoma     | PD-1  | AIN             | yes | 3  | no  | NA                     | no  | NA |
| Karo, N. L.     | 2020 | female | 64 | lung cancer  | PD-1  | AIN             | yes | 3  | yes | NA                     | yes | NA |
| Annamaraju, P.  | 2020 | female | 51 | lung cancer  | PD-1  | AASV            | yes | 2  | no  | NA                     | NA  | NA |

**Supplemental Table S3. (continued)**

|                   |      |        |    |              |             |                                   |     |    |     |                     |     |    |
|-------------------|------|--------|----|--------------|-------------|-----------------------------------|-----|----|-----|---------------------|-----|----|
| Mukherjee, A.     | 2020 | female | 73 | lung cancer  | PD-1        | ATIN                              | yes | 3  | yes | NA                  | NA  | NA |
| Hassanein, M.     | 2020 | female | 81 | lung cancer  | PD-1        | ATIN                              | yes | 3  | yes | NA                  | no  | NA |
| Bickel, A.        | 2016 | male   | 62 | other        | PD-1        | MCD                               | yes | NA | yes | stable              | no  | NA |
| Hayata, Manabu    | 2020 | male   | 68 | other        | PD-1        | TMA                               | yes | 3  | no  | NA                  | no  | NA |
| Kim, D. W.        | 2021 | female | 46 | melanoma     | PD-1        | FSGS                              | no  | NA | NA  | NA                  | no  | NA |
| Padala, S. A.     | 2021 | female | 46 | other        | PD-1        | Acute antibody mediated rejection | yes | 3  | no  | partial control     | no  | NA |
| Bonilla, M.       | 2021 | male   | 88 | renal cancer | PD-L1       | MN                                | yes | 1  | yes | progressive disease | no  | NA |
| Venkatachalam, K. | 2020 | male   | 69 | other        | PD-1        | Acute antibody mediated rejection | yes | 3  | no  | progressive disease | NA  | NA |
| Venkatachalam, K. | 2020 | male   | 68 | melanoma     | PD-1+CTLA-4 | Acute antibody mediated rejection | yes | 3  | no  | complete control    | NA  | NA |
| Thomas, M. J. A.  | 2018 | female | 73 | melanoma     | PD-1        | AASV                              | yes | 3  | yes | progressive disease | NA  | NA |
| Okawa, S.         | 2020 | male   | 63 | lung cancer  | PD-1        | ATIN                              | yes | 3  | yes | NA                  | NA  | NA |
| Efe, O.           | 2020 | female | 52 | lung cancer  | PD-1        | ATIN, GN                          | yes | 3  | yes | NA                  | no  | NA |
| Faieta, A.        | 2021 | male   | 65 | renal cancer | PD-1        | ATIN                              | yes | 3  | yes | stable              | no  | NA |
| Hu, Q.            | 2020 | male   | 66 | other        | PD-1        | ATN, IgA nephropathy              | yes | 2  | yes | stable              | yes | no |
| M. Espi           | 2020 | male   | 66 | lung cancer  | PD-1        | ATIN                              | yes | 1  | no  | NA                  | NA  | NA |
| M. Espi           | 2020 | male   | 68 | melanoma     | PD-1        | ATIN                              | yes | 1  | no  | NA                  | NA  | NA |
| M. Espi           | 2020 | female | 77 | melanoma     | PD-1        | ATIN                              | yes | 2  | yes | NA                  | NA  | NA |

**Supplemental Table S3. (continued)**

|                  |      |        |    |                       |             |                                      |     |    |     |                        |     |    |
|------------------|------|--------|----|-----------------------|-------------|--------------------------------------|-----|----|-----|------------------------|-----|----|
| M. Espi          | 2020 | male   | 85 | melanoma              | PD-1        | ATIN                                 | yes | 2  | no  | NA                     | NA  | NA |
| M. Espi          | 2020 | female | 85 | melanoma              | PD-1        | ATIN                                 | yes | 3  | yes | NA                     | NA  | NA |
| Oki, R.          | 2020 | female | 75 | lung cancer           | PD-1        | ATIN, IgA nephropathy                | no  | NA | NA  | progressive<br>disease | no  | NA |
| Rashidi, A.      | 2021 | male   | 76 | hematologic<br>cancer | PD-1        | ATIN                                 | yes | 2  | yes | NA                     | NA  | NA |
| Herrmann, S.     | 2021 | male   | 60 | lung cancer           | PD-1        | ATIN                                 | yes | 1  | yes | NA                     | no  | NA |
| Herrmann, S.     | 2021 | male   | 70 | lung cancer           | PD-1        | ATIN                                 | yes | 3  | yes | NA                     | no  | NA |
| Gallan, A. J.    | 2019 | male   | 68 | melanoma              | PD-1        | vasculitis                           | yes | 1  | no  | NA                     | no  | NA |
| Gallan, A. J.    | 2019 | female | 71 | lung cancer           | PD-1        | AASV                                 | no  | NA | NA  | NA                     | NA  | NA |
| Gallan, A. J.    | 2019 | female | 75 | lung cancer           | PD-1        | AIN                                  | yes | 3  | yes | NA                     | NA  | NA |
| Gallan, A. J.    | 2019 | female | 63 | melanoma              | PD-1        | AIN, vasculitis                      | yes | 3  | yes | NA                     | NA  | NA |
| Glutsch, V.      | 2019 | male   | 68 | melanoma              | PD-1        | MCD                                  | yes | 3  | yes | progressive<br>disease | yes | no |
| Chang, Y.        | 2020 | male   | 72 | other                 | PD-1        | AIN                                  | yes | 2  | yes | NA                     | NA  | NA |
| Kawakado, K.     | 2021 | male   | 63 | lung cancer           | PD-1        | ATN                                  | yes | 3  | yes | NA                     | NA  | NA |
| Sebastian, A. D. | 2018 | male   | 75 | lung cancer           | PD-1        | AA                                   | no  | NA | NA  | partial control        | NA  | NA |
| Murakami, N.     | 2016 | male   | 75 | melanoma              | PD-1+CTLA-4 | AIN                                  | yes | 3  | yes | NA                     | no  | NA |
| Person, F.       | 2020 | male   | 55 | melanoma              | PD-1+CTLA-4 | AIN, TMA                             | yes | 3  | no  | progressive<br>disease | yes | no |
| Vishwanath, M.   | 2018 | male   | 58 | renal cancer          | PD-1        | Acute antibody mediated<br>rejection | yes | 3  | no  | NA                     | no  | NA |

**Supplemental Table S3. (continued)**

|                         |      |        |    |             |        |                                      |     |    |     |                        |     |     |
|-------------------------|------|--------|----|-------------|--------|--------------------------------------|-----|----|-----|------------------------|-----|-----|
| Molteni, A.             | 2018 | female | 69 | melanoma    | PD-1   | ATIN                                 | yes | NA | yes | NA                     | no  | NA  |
| Taki, T.                | 2020 | male   | 75 | lung cancer | PD-1   | ATIN                                 | yes | 2  | yes | progressive<br>disease | yes | no  |
| Saly, D. L.             | 2018 | male   | 61 | lung cancer | PD-1   | ATIN                                 | yes | 3  | yes | partial control        | yes | yes |
| Tabei, A.               | 2018 | male   | 57 | lung cancer | PD-1   | ATIN                                 | yes | 3  | yes | NA                     | NA  | NA  |
| Pichler Sekulic, Simona | 2020 | male   | 61 | lung cancer | PD-1   | ATN                                  | yes | 3  | yes | NA                     | NA  | NA  |
| Soellradl, I.           | 2018 | male   | 58 | melanoma    | CTLA-4 | Acute antibody mediated<br>rejection | yes | NA | no  | NA                     | yes | yes |
| Vakil, V.               | 2018 | male   | 66 | other       | PD-1   | ATIN                                 | yes | 1  | yes | NA                     | NA  | NA  |
| Uchida, A.              | 2017 | male   | 67 | lung cancer | PD-1   | ATIN                                 | yes | 3  | yes | stable                 | no  | NA  |
| Shah, N.                | 2019 | male   | 70 | melanoma    | PD-1   | ATIN                                 | yes | NA | yes | stable                 | NA  | NA  |
| Fadel, N.               | 2009 | male   | 64 | melanoma    | CTLA-4 | lupus nephritis                      | no  | NA | NA  | stable                 | no  | NA  |

Abbreviations: AKD: acute kidney disease; irAE: immune-related adverse events; NA: not applicable; ATIN: acute tubulo-interstitial nephritis; ATN: acute tubular necrosis; AIN: acute interstitial nephritis; MCD: minimal change disease; FSGS: focal segmental glomerulosclerosis; MN: membranous nephropathy; GN: glomerulonephritis; AASV: ANCA-associated small vessel vasculitis; TMA: thrombotic microangiopathy; AA: renal amyloidosis



**Supplemental Table S4.** Summary of cohort studies.

|                                    | <b>Alexandre O<br/>(n=63)</b> | <b>Hassan Izzedine<br/>(n=12)</b> | <b>Frank B.<br/>Cortazar (n=60)</b> | <b>Clarissa Cassol<br/>(n=15)</b> | <b>Juliana B(N=13)</b> | <b>Total (n=163)</b> |
|------------------------------------|-------------------------------|-----------------------------------|-------------------------------------|-----------------------------------|------------------------|----------------------|
| <b>Age</b>                         | NA                            | 69.75                             | 64(58-73)                           | 60.8±10.5                         | 71±8.5                 | NA                   |
| <b>Male [n/N(%)]</b>               | 44/63                         | 7/12                              | 39/60                               | 10/15                             | 8/13                   | 108/163              |
| <b>Hypertension [n/N(%)]</b>       | 33/63                         | 5/12                              | 30/60                               | NA                                | 7/13                   | 75/148               |
| <b>Diabetics [n/N(%)]</b>          | 4/63                          | 1/12                              | 9/60                                | NA                                | 3/13                   | 17/148               |
| <b>CKD [n/N(%)]</b>                | NA                            | NA                                | 19/60                               | NA                                | NA                     | 19/60                |
| <b>CHD [n/N(%)]</b>                | 5/63                          | NA                                | NA                                  | NA                                | NA                     | 5/63                 |
| <b>Tumor type</b>                  |                               |                                   |                                     |                                   |                        |                      |
| <b>Melanoma [n/N(%)]</b>           | 24/63                         | 9/12                              | 20/60                               | 7/15                              | 3/13                   | 63/163               |
| <b>Lung cancer [n/N(%)]</b>        | 26/63                         | 0/12                              | 15/60                               | 4/15                              | 9/13                   | 54/163               |
| <b>Renal cancer [n/N(%)]</b>       | 5/63                          | 0/12                              | NA                                  | 3/15                              | 0/13                   | 8/103                |
| <b>Hematologic cancer [n/N(%)]</b> | 1/63                          | 1/12                              | NA                                  | 0/15                              | 0/13                   | 2/103                |
| <b>Others [n/N(%)]</b>             | 7/63                          | 2/12                              | NA                                  | 1/15                              | 1/13                   | 11/103               |
| <b>ICI type</b>                    |                               |                                   |                                     |                                   |                        |                      |
| <b>PD-1/PD-L1 [n/N(%)]</b>         | 54/63                         | 12/12                             | 41/60                               | 11/15                             | 11/13                  | 129/163              |
| <b>CTLA-4 [n/N(%)]</b>             | 5/63                          | 0/12                              | 1/60                                | 0/15                              | 0/13                   | 6/163                |
| <b>Combination [n/N(%)]</b>        | 4/63                          | 0/12                              | 18/60                               | 4/15                              | 2/13                   | 28/163               |
| <b>Other treatment</b>             |                               |                                   |                                     |                                   |                        |                      |

**Supplemental Table S4.** (continued)

|                                       |            |             |                 |         |           |         |
|---------------------------------------|------------|-------------|-----------------|---------|-----------|---------|
| <b>Only ICI [n/N(%)]</b>              | 59/63      | 9/12        | NA              | 13/14   | 13/13     | 94/102  |
| <b>ICI+ targeted therapy [n/N(%)]</b> | 0/63       | 1/12        | NA              | 0/14    | 0/13      | 1/102   |
| <b>ICI+ Chemotherapy [n/N(%)]</b>     | 2/63       | 2/12        | NA              | 1/14    | 0/13      | 5/102   |
| <b>ICI+VEGF [n/N(%)]</b>              | 2/63       | 0/12        | NA              | 0/14    | 0/13      | 2/102   |
| <b>Interval time (d)</b>              | 105.5±98.6 | 270(30-720) | NA              | 219±210 | NA        | NA      |
| <b>PPI [n/N(%)]</b>                   | 23/53      | NA          | 33/60           | 6/11    | 9/13      | 71/137  |
| <b>NSAIDs [n/N(%)]</b>                | 5/53       | NA          | NA              | 1/12    | 3/13      | 9/78    |
| <b>Baseline Scr (mg/dl)</b>           | 1.09±0.26  | NA          | 0.94(0.80-1.34) | 3.2±1.4 | 1.01±0.32 | NA      |
| <b>Peak Scr (mg/dl)</b>               | 3.26±1.56  | NA          | NA              | NA      | 4.19±1.43 | NA      |
| <b>AKD [n/N(%)]</b>                   | 63/63      | 11/12       | 60/60           | 15/15   | 13/13     | 162/163 |
| <b>AKD grade</b>                      |            |             |                 |         |           |         |
| <b>1 grade [n/N(%)]</b>               | NA         | NA          | NA              | NA      | NA        | NA      |
| <b>2 grade [n/N(%)]</b>               | NA         | NA          | NA              | NA      | NA        | NA      |
| <b>3 grade [n/N(%)]</b>               | 23/63      | NA          | NA              | NA      | NA        | 23/63   |
| <b>Only Proteinuria [n/N(%)]</b>      | 0/63       | 1/12        | 0/60            | 0/15    | 0/13      | 1/163   |
| <b>Extra renal irAE [n/N(%)]</b>      | 25/63      | NA          | 22/56           | 6/15    | NA        | 53/134  |
| <b>Skin [n/N(%)]</b>                  | 7/63       | NA          | 6/56            | 1/15    | NA        | 14/134  |
| <b>Gastrointestinal [n/N(%)]</b>      | 8/63       | NA          | NA              | 1/15    | NA        | 9/78    |
| <b>Endocrine [n/N(%)]</b>             | 2/63       | NA          | NA              | 3/15    | NA        | 5/78    |

**Supplemental Table S4. (continued)**

|                                     |       |       |       |      |       |         |
|-------------------------------------|-------|-------|-------|------|-------|---------|
| <b>Pneumonitis [n/N(%)]</b>         | 2/63  | NA    | 1/56  | 0/15 | NA    | 3/134   |
| <b>Others <sup>d</sup> [n/N(%)]</b> | 6/63  | NA    | NA    | 1/15 | NA    | 1/78    |
| <b>ATIN/AIN</b>                     | 52/63 | 4/12  | 56/60 | 9/15 | 13/13 | 134/163 |
| <b>ATN</b>                          | 6/63  | 6/12  | 0/60  | 6/15 | 0/13  | 18/163  |
| <b>MCD</b>                          | 0/63  | 2/12  | 1/60  | 0/15 | 0/13  | 3/163   |
| <b>Anti-GBM disease</b>             | 0/63  | 0/12  | 1/60  | 0/15 | 0/13  | 1/163   |
| <b>Vasculitis</b>                   | 1/63  | 0/12  | 1/60  | 0/15 | 0/13  | 2/163   |
| <b>FSGS</b>                         | 1/63  | 0/12  | 0/60  | 0/15 | 0/13  | 1/163   |
| <b>Unkown GN</b>                    | 2/63  | 0/12  | 0/60  | 0/15 | 0/13  | 2/163   |
| <b>C3 GN</b>                        | 0/63  | 0/12  | 1/60  | 0/15 | 0/13  | 1/163   |
| <b>MN</b>                           | 1/63  | 0/12  | 0/60  | 0/15 | 0/13  | 1/163   |
| <b>Corticosteroid</b>               | 56/63 | 7/12  | 53/60 | 9/15 | 13/13 | 138/163 |
| <b>Intravenous corticosteroid</b>   | NA    | NA    | 15/60 | 0/15 | 3/13  | 18/88   |
| <b>Immunosuppressants</b>           | 0/63  | 0/12  | 7/60  | NA   | 0/13  | 7/148   |
| <b>Discontinued ICI</b>             | 63/63 | 10/12 | 60/60 | 6/10 | NA    | 139/145 |
| <b>RRT</b>                          | 5/63  | 1/12  | NA    | 1/15 | NA    | 7/90    |
| <b>Disruption of RRT</b>            | NA    | 0/1   | NA    | 1/1  | NA    | 1/2     |
| <b>Renal function recovery</b>      |       |       |       |      |       |         |
| <b>Complete recovery</b>            | 17/59 | NA    | 26/60 | 7/11 | 6/13  | 56/143  |
| <b>Partial recovery</b>             | 34/59 | NA    | 25/60 | NA   | NA    | 59/119  |
| <b>No recovery</b>                  | 8/59  | NA    | 9/60  | NA   | NA    | 17/119  |

**Supplemental Table S4.** (continued)

|                    |       |      |    |      |    |       |
|--------------------|-------|------|----|------|----|-------|
| <b>Death</b>       | 1/63  | 2/12 | NA | 5/15 | NA | 8/90  |
| <b>Rechallenge</b> | 17/57 | 1/12 | NA | 0/15 | NA | 18/84 |
| <b>Flare</b>       | 0/17  | 1/1  | NA | 0/0  | NA | 1/18  |

Abbreviations: HTN: hypertension; DM: diabetes mellitus; RRT: renal replacement therapy; IV-glucocorticoid: intravenous glucocorticoid; ATN: acute tubular necrosis; ATIN: acute tubulo-interstitial nephritis; AIN: acute interstitial nephritis; MCD: minimal change disease; FSGS: focal segmental glomerulosclerosis; TMA: thrombotic microangiopathy; MN: membranous nephropathy; GN: glomerulonephritis; AA: amyloidosis protein A; Anti-GBM disease: anti-glomerular basement membrane disease

**Supplemental Table S5.** The Newcastle-Ottawa scale (NOS) quality assessment of the enrolled studies.

| Study ID                    | SELECTION             |                   |                  | COMPARABILITY                                                 |                                                        | OUTCOME       |                                              |                                      | Total <sup>a</sup> |
|-----------------------------|-----------------------|-------------------|------------------|---------------------------------------------------------------|--------------------------------------------------------|---------------|----------------------------------------------|--------------------------------------|--------------------|
|                             | Representativeness of | Selection of the  | Ascertainment of | Demonstration that outcome                                    | Comparability of cohorts                               | Assessment of | Was follow-up long                           | Adequacy of                          |                    |
|                             | the exposed cohort    | nonexposed cohort | exposure         | of interest was not present at<br>start of study <sup>b</sup> | on the basis of the design<br>or analysis <sup>c</sup> | outcome       | enough for outcomes<br>to occur <sup>d</sup> | follow up of<br>cohorts <sup>e</sup> |                    |
| Juliana B.<br>Draibe 2020   | somewhat*             | same institute*   | record*          | no                                                            | *                                                      | record*       | yes*                                         | yes*                                 | 7                  |
| Cassol, C.<br>2019          | somewhat*             | same institute*   | record*          | no                                                            | -                                                      | record*       | yes*                                         | yes*                                 | 6                  |
| Dinh, A.<br>2020            | somewhat *            | different source  | record*          | no                                                            | -                                                      | record*       | yes*                                         | yes*                                 | 5                  |
| Alexandre O.<br>Gérard 2021 | somewhat *            | same institute*   | record*          | no                                                            | -                                                      | record*       | yes*                                         | yes*                                 | 6                  |
| Hassan<br>Izzedine 2019     | somewhat *            | same institute*   | record*          | no                                                            | -                                                      | record*       | yes*                                         | yes*                                 | 6                  |

- indicates Zero score, \* indicates one score, \*\* indicates two scores

a. Each study could be awarded a maximum of nine stars: a maximum of two stars for the item regarding comparability and a maximum of one star for other 7 items

b. One score was awarded if a study was a prospective cohort study

c. A maximum of two stars could be awarded for this item. If a study performed landmark analysis, one score was awarded. If a study adjusted for confounding factors (eg. ECOG PS, age, metastases status, serum low density lipoprotein level, prior treatment line, etc.), an additional score was awarded

d. For studies reporting renal outcomes, one score was awarded.

e. If a study reported a follow up rate of more than or equal to 80%, one score was awarded

**Supplemental Table S6.** Quality assessment of case/case series/conference abstracts.

| Study ID                |      | Selection      | Ascertainment  |                | Causality      |                |                |                | Reporting      | Total Assessment |
|-------------------------|------|----------------|----------------|----------------|----------------|----------------|----------------|----------------|----------------|------------------|
| Author                  | Year | 1 <sup>a</sup> | 2 <sup>b</sup> | 3 <sup>c</sup> | 4 <sup>d</sup> | 5 <sup>e</sup> | 6 <sup>f</sup> | 7 <sup>g</sup> | 8 <sup>h</sup> |                  |
| Shah, N.                | 2019 | yes            | yes            | yes            | yes            | yes            | no             | yes            | yes            | 7good            |
| Uchida, A.              | 2017 | yes            | yes            | yes            | yes            | yes            | no             | yes            | yes            | 7good            |
| Vakil, V.               | 2018 | yes            | yes            | yes            | yes            | yes            | no             | yes            | yes            | 7good            |
| Pichler Sekulic, Simona | 2020 | yes            | yes            | yes            | yes            | yes            | no             | yes            | yes            | 7good            |
| Tabei, A.               | 2018 | yes            | yes            | yes            | yes            | yes            | no             | yes            | yes            | 7good            |
| Saly, D. L.             | 2018 | yes            | yes            | yes            | no             | yes            | no             | yes            | yes            | 6good            |
| Taki, T.                | 2020 | yes            | yes            | yes            | yes            | yes            | no             | yes            | yes            | 7good            |
| Person, F.              | 2020 | yes            | yes            | yes            | yes            | yes            | no             | yes            | yes            | 7good            |
| Murakami, N.            | 2016 | yes            | yes            | yes            | yes            | yes            | no             | yes            | yes            | 7good            |
| Kawakado, K.            | 2021 | yes            | yes            | yes            | no             | yes            | no             | yes            | yes            | 6good            |
| Glutsch, V.             | 2019 | yes            | yes            | yes            | yes            | yes            | no             | yes            | yes            | 7good            |
| Gallan, A. J.           | 2019 | yes            | yes            | yes            | yes            | yes            | no             | yes            | yes            | 7good            |
| Herrmann, S.            | 2021 | yes            | yes            | yes            | no             | yes            | no             | yes            | yes            | 6good            |
| Rashidi, A.             | 2021 | yes            | yes            | yes            | yes            | yes            | no             | yes            | yes            | 7good            |
| Oki, R.                 | 2020 | yes            | yes            | yes            | no             | yes            | no             | no             | yes            | 5fair            |
| Hu, Q.                  | 2020 | yes            | yes            | yes            | yes            | yes            | no             | yes            | yes            | 7good            |
| Faieta, A.              | 2021 | yes            | yes            | yes            | yes            | yes            | no             | yes            | yes            | 7good            |
| Okawa, S.               | 2020 | yes            | yes            | yes            | no             | yes            | no             | yes            | yes            | 6good            |
| Venkatachalam, K.       | 2020 | yes            | yes            | yes            | no             | no             | no             | yes            | yes            | 5fair            |
| Bonilla, M.             | 2021 | yes            | yes            | yes            | yes            | yes            | no             | yes            | yes            | 6good            |

**Supplemental Table S6. (continued)**

|                       |      |     |     |     |     |     |    |     |     |       |
|-----------------------|------|-----|-----|-----|-----|-----|----|-----|-----|-------|
| Padala, S. A.         | 2021 | yes | yes | yes | yes | yes | no | yes | yes | 7good |
| Kim, D. W.            | 2021 | yes | yes | yes | yes | yes | no | no  | yes | 6good |
| Hayata, Manabu        | 2020 | yes | yes | yes | yes | yes | no | yes | yes | 7good |
| Bickel, A.            | 2016 | yes | yes | yes | no  | yes | no | yes | yes | 7good |
| Mukherjee, A.         | 2020 | yes | yes | yes | yes | yes | no | yes | yes | 6good |
| Wakabayashi, K.       | 2021 | yes | yes | yes | no  | yes | no | no  | yes | 6good |
| Tanabe, K.            | 2020 | yes | yes | yes | yes | yes | no | yes | yes | 6good |
| Nakatani, Y.          | 2018 | yes | yes | yes | yes | yes | no | yes | yes | 7good |
| Daanen, R. A.         | 2017 | yes | yes | yes | yes | yes | no | yes | yes | 7good |
| Shim, J.              | 2021 | yes | yes | yes | no  | yes | no | yes | yes | 7good |
| Ai, Luoyan            | 2021 | yes | yes | yes | yes | yes | no | yes | yes | 6good |
| Jung, Kyungsuk        | 2016 | yes | yes | yes | yes | yes | no | yes | yes | 7good |
| Kitchlu, A.           | 2017 | yes | yes | yes | yes | yes | no | yes | yes | 6good |
| Messias, Ana          | 2019 | yes | yes | yes | no  | yes | no | no  | yes | 7good |
| Vaughan, E.           | 2020 | yes | yes | yes | yes | yes | no | yes | yes | 5fair |
| Gao, B.               | 2018 | yes | yes | yes | yes | yes | no | no  | yes | 6good |
| Cruz-Whitley, J.      | 2020 | yes | yes | yes | yes | yes | no | yes | yes | 7good |
| Izzedine, H.          | 2021 | yes | yes | yes | yes | yes | no | yes | yes | 7good |
| Lemoine, M.           | 2019 | yes | yes | yes | yes | yes | no | yes | yes | 7good |
| Kidd, J. M.           | 2016 | yes | yes | yes | no  | yes | no | yes | yes | 7good |
| Thajudeen, B.         | 2015 | yes | yes | yes | yes | yes | no | yes | yes | 6good |
| Escandon, J.          | 2017 | yes | yes | yes | no  | yes | no | no  | yes | 7good |
| de Sousa Oliveira, D. | 2019 | yes | yes | yes | yes | yes | no | no  | yes | 4fair |

**Supplemental Table S6. (continued)**

|                         |      |     |     |     |     |     |    |     |     |       |
|-------------------------|------|-----|-----|-----|-----|-----|----|-----|-----|-------|
| Lin, J. S.              | 2021 | yes | yes | yes | no  | yes | no | yes | yes | 7good |
| Parza, K.               | 2021 | yes | yes | yes | yes | yes | no | yes | yes | 6good |
| Lapman, S.              | 2020 | yes | yes | yes | yes | yes | no | yes | yes | 7good |
| Koda, R.                | 2018 | yes | yes | yes | yes | yes | no | yes | yes | 7good |
| Tawhari, I.             | 2020 | yes | yes | yes | yes | yes | no | yes | yes | 7good |
| Takahashi, N.           | 2018 | yes | yes | yes | yes | yes | no | yes | yes | 7good |
| Sise, M. E.             | 2019 | yes | yes | yes | no  | yes | no | yes | yes | 7good |
| Gebauer, E.             | 2021 | yes | yes | yes | yes | yes | no | yes | yes | 6good |
| Cortazar, F. B.         | 2016 | yes | yes | yes | yes | yes | no | yes | yes | 7good |
| Aratani, S.             | 2021 | yes | yes | yes | no  | yes | no | yes | yes | 7good |
| Mamlouk, O.             | 2020 | yes | yes | yes | yes | yes | no | yes | yes | 6good |
| Chemaly, E. R.          | 2020 | yes | yes | yes | yes | yes | no | yes | yes | 7good |
| Martínez Valenzuela, L. | 2021 | yes | yes | yes | yes | yes | no | yes | yes | 7good |
| Izzedine, H.            | 2014 | yes | yes | yes | yes | yes | no | yes | yes | 7good |
| Shirali, A. C.          | 2021 | yes | yes | yes | yes | yes | no | yes | yes | 7good |
| Noto-Kadou-Kaza, B.     | 2021 | yes | yes | yes | yes | yes | no | yes | yes | 7good |
| Sammartino, C.          | 2010 | yes | yes | yes | yes | yes | no | yes | yes | 7good |
| Jolly, E. C.            | 2009 | yes | yes | yes | yes | yes | no | yes | yes | 7good |
| Uner, M.                | 2021 | yes | yes | yes | yes | yes | no | yes | yes | 7good |
| Basnet, S.              | 2019 | yes | yes | yes | no  | yes | no | yes | yes | 7good |
| Xipell, M.              | 2018 | yes | yes | yes | yes | yes | no | yes | yes | 6good |
| Irifuku, T.             | 2020 | yes | yes | yes | no  | yes | no | yes | yes | 7good |
| Gordon, L.              | 2019 | yes | yes | yes | no  | yes | no | yes | yes | 6good |



**Supplemental Table S6. (continued)**

|                        |      |     |     |     |     |     |    |     |     |       |
|------------------------|------|-----|-----|-----|-----|-----|----|-----|-----|-------|
| Ryuzaki, M.            | 2019 | yes | yes | yes | yes | yes | no | yes | yes | 6good |
| Belliere, J.           | 2016 | yes | yes | yes | no  | yes | no | yes | yes | 7good |
| Georgianos, P. I.      | 2019 | yes | yes | yes | yes | yes | no | yes | yes | 6good |
| Oleas, Diana           | 2021 | yes | yes | yes | no  | yes | no | yes | yes | 7good |
| Mulroy, M.             | 2021 | yes | yes | yes | yes | yes | no | yes | yes | 6good |
| Bottlaender, Lea       | 2017 | yes | yes | yes | yes | yes | no | yes | yes | 7good |
| Buyansky, Dimitry      | 2017 | yes | yes | yes | yes | yes | no | yes | yes | 7good |
| Patel, V.              | 2020 | yes | yes | yes | yes | yes | no | yes | yes | 7good |
| Charmetant, X.         | 2019 | yes | yes | yes | yes | yes | no | no  | yes | 6good |
| Mamlouk, O.            | 2020 | yes | yes | yes | no  | yes | no | no  | yes | 5fair |
| Soellradl, I.          | 2018 | yes | yes | yes | no  | yes | no | no  | yes | 5fair |
| Toda, M. G.            | 2021 | yes | yes | yes | yes | yes | no | no  | yes | 5fair |
| Oliveira, D. S.        | 2019 | yes | yes | yes | yes | yes | no | yes | yes | 6good |
| Tanaka, A.             | 2017 | yes | yes | yes | no  | yes | no | yes | yes | 7good |
| M. Espi                | 2020 | yes | yes | yes | yes | yes | no | yes | yes | 6good |
| Sebastian Hultin       | 2020 | yes | yes | yes | yes | yes | no | no  | yes | 6good |
| Omar Mamlouk           | 2019 | yes | yes | yes | no  | yes | no | no  | yes | 5fair |
| Alejandro Meraz- Muñoz | 2020 | yes | yes | yes | no  | yes | no | yes | yes | 6good |
| Okamoto, M.            | 2020 | yes | yes | yes | yes | yes | no | no  | yes | 6good |
| Narayanankutty, N. P.  | 2019 | yes | yes | yes | yes | yes | no | no  | yes | 6good |
| Marvania, N.           | 2020 | yes | yes | yes | yes | yes | no | yes | yes | 7good |
| Catapano, F.           | 2021 | yes | yes | yes | yes | yes | no | yes | yes | 7good |
| Panthofer, A. M.       | 2020 | yes | yes | yes | yes | yes | no | yes | yes | 7good |

**Supplemental Table S6. (continued)**

|                    |      |     |     |     |     |     |    |     |     |       |
|--------------------|------|-----|-----|-----|-----|-----|----|-----|-----|-------|
| Chua, J.           | 2020 | yes | yes | yes | yes | yes | no | yes | yes | 7good |
| George, S.         | 2019 | yes | yes | yes | yes | yes | no | yes | yes | 7good |
| Mamlouk, O.        | 2019 | yes | yes | yes | yes | yes | no | yes | yes | 7good |
| Pampols, P. A.     | 2020 | yes | yes | yes | yes | yes | no | yes | yes | 7good |
| Abramson, M.       | 2020 | yes | yes | yes | yes | yes | no | yes | yes | 7good |
| Lo, W. K.          | 2020 | yes | yes | yes | yes | yes | no | yes | yes | 7good |
| Leuprecht, L.      | 2020 | yes | yes | yes | yes | yes | no | yes | yes | 7good |
| Bobart, S.         | 2020 | yes | yes | yes | yes | yes | no | yes | yes | 7good |
| Mohan, S.          | 2018 | yes | yes | yes | yes | yes | no | yes | yes | 7good |
| Savedchuk, S.      | 2019 | yes | yes | yes | yes | yes | no | yes | yes | 7good |
| Tadros, M. G.      | 2019 | yes | yes | yes | yes | yes | no | yes | yes | 7good |
| Montanez, M.       | 2020 | yes | yes | yes | yes | yes | no | yes | yes | 7good |
| Lin, J.            | 2020 | yes | yes | yes | yes | yes | no | yes | yes | 7good |
| Duque, J.          | 2018 | yes | yes | yes | yes | yes | no | yes | yes | 7good |
| Baradhi, K. M.     | 2018 | yes | yes | yes | yes | yes | no | yes | yes | 7good |
| Leger, K.          | 2019 | yes | yes | yes | yes | yes | no | yes | yes | 7good |
| Nagaraju, G.       | 2018 | yes | yes | yes | yes | yes | no | yes | yes | 7good |
| Jensen, C.         | 2019 | yes | yes | yes | yes | yes | no | no  | yes | 6good |
| Meraz-Munoz, A. Y. | 2019 | yes | yes | yes | yes | yes | no | no  | yes | 6good |
| Makati, D.         | 2018 | yes | yes | yes | yes | yes | no | yes | yes | 7good |
| Hninn, W. Y.       | 2019 | yes | yes | yes | yes | yes | no | yes | yes | 7good |
| Leonard, D.        | 2020 | yes | yes | yes | yes | yes | no | yes | yes | 7good |
| Annamaraju, P.     | 2020 | yes | yes | yes | yes | yes | no | yes | yes | 7good |

**Supplemental Table S6. (continued)**

|                  |      |     |     |     |     |     |    |     |     |       |
|------------------|------|-----|-----|-----|-----|-----|----|-----|-----|-------|
| Hassanein, M.    | 2020 | yes | yes | yes | no  | yes | no | yes | yes | 6good |
| Karo, N. L.      | 2020 | yes | yes | yes | no  | yes | no | yes | yes | 6good |
| Thomas, M. J. A. | 2018 | yes | yes | yes | yes | yes | no | yes | yes | 7good |
| Efe, O.          | 2020 | yes | yes | yes | no  | yes | no | yes | yes | 6good |
| Chang, Y.        | 2020 | yes | yes | yes | yes | yes | no | yes | yes | 7good |
| Sebastian, A. D. | 2018 | yes | yes | yes | yes | yes | no | no  | yes | 6good |
| Vishwanath, M.   | 2018 | yes | yes | yes | yes | yes | no | yes | yes | 7good |
| Molteni, A.      | 2018 | yes | yes | yes | yes | yes | no | yes | yes | 7good |
| Fadel, N.        | 2009 | yes | yes | yes | yes | yes | no | yes | yes | 7good |

- a. Did the researcher(s) specified why this case was reported?
- b. Was the exposure adequately ascertained?
- c. Was the outcome adequately ascertained?
- d. If other alternative causes(any other medication except NSAIDS/PPI that was possible to cause renal lesions) was reported, were they ruled out?
- e. Was there a challenge/rechallenge phenomenon, or was renal function stable after cessation of ICI/corticosteroid treatment?
- f. Was there a dose–response effect?
- g. Was follow-up long enough for renal outcomes or death to occur?
- h. Is the case(s) described with sufficient details to allow other investigators to replicate the research or to allow practitioners make inferences related to their own practice?

**Supplemental Table S7.** Risk factors for ICI-associated kidney IRAEs with ATIN/AIN and ATN

|                             |                     | Univariate logistic analysis |                    | Multiple logistic analysis |                    | ATN(n=11)  | Univariate logistic analysis |                     |
|-----------------------------|---------------------|------------------------------|--------------------|----------------------------|--------------------|------------|------------------------------|---------------------|
|                             | ATIN/AIN<br>(n=143) | P value                      | OR (95 CI)         | P value                    | OR (95 CI)         |            | P value                      | OR (95 CI)          |
| <b>Age</b>                  | 68(62,74)           | <b>0.001</b>                 | 1.040(1.015,1.065) | <b>0.006</b>               | 1.055(1.016,1.097) | 63(58,70)  | 0.402                        | 0.982(0.940,1.025)  |
| <b>Male</b>                 | 92/143(64.3)        | <b>0.034</b>                 | 0.503(0.266,0.951) | <b>0.026</b>               | 0.321(0.118,0.875) | 11/11(100) | 0.997                        |                     |
| <b>Comorbidities</b>        |                     |                              |                    |                            |                    |            |                              |                     |
| <b>Hypertension</b>         | 55/107(51.4)        | 0.273                        | 1.461(0.742,2.876) |                            |                    | 5/10(50.0) | 0.917                        | 1.070(0.297,3.854)  |
| <b>Diabetics</b>            | 15/108(13.9)        | 0.135                        | 0.524(0.225,1.222) |                            |                    | 2/10(20.0) | 0.793                        | 1.240(0.248,6.191)  |
| <b>CKD</b>                  | 27/108(25.0)        | 0.742                        | 0.881(0.415,1.872) |                            |                    | 3/10(30.0) | 0.753                        | 1.252(0.308,5.086)  |
| <b>CHD</b>                  | 9/108(8.3)          | 0.492                        | 0.682(0.229,2.031) |                            |                    | 2/10(20.0) | 0.254                        | 2.615(0.502,13.627) |
| <b>Tumor type</b>           |                     | <b>0.014</b>                 |                    | 0.446                      |                    |            | 0.934                        |                     |
| <b>Melanoma</b>             | 62/143(43.4)        |                              |                    |                            |                    | 0/11(0)    |                              |                     |
| <b>Lung cancer</b>          | 42/143(29.4)        | 0.625                        | 1.210(0.564,2.593) | 0.092                      |                    | 4/11(36.4) | 0.997                        |                     |
| <b>Renal cancer</b>         | 11/143(7.7)         | 0.102                        | 0.444(0.167,1.175) | 0.783                      |                    | 1/11(9.1)  | 0.997                        |                     |
|                             | 7/143(4.9)          | <b>0.004</b>                 | 0.339(0.161,0.712) | 0.868                      |                    | 1/11(9.1)  | 0.997                        |                     |
| <b>Hematological cancer</b> |                     |                              |                    |                            |                    |            |                              |                     |
| <b>Others</b>               | 21/143(14.7)        | 0.290                        | 2.083(0.535,8.106) | 0.170                      |                    | 5/11(45.5) | 0.996                        |                     |
| <b>ICI type</b>             |                     | 0.642                        |                    |                            |                    |            | 0.999                        |                     |
| <b>PD-1</b>                 | 93/137(67.9)        |                              |                    |                            |                    | 9/10(90.0) |                              |                     |
| <b>PD-L1</b>                | 6/137(4.4)          | 0.448                        | 0.619(0.180,2.134) |                            |                    | 1/10(10.0) | 0.999                        |                     |

**Supplemental Table S7.** (continued)

|                    |                         |              |                     |                    |                 |              |                    |
|--------------------|-------------------------|--------------|---------------------|--------------------|-----------------|--------------|--------------------|
| <b>CTLA-4</b>      | 9/137(6.6)              | 0.443        | 0.664(0.233,1.891)  |                    | 0/10(0)         | 0.998        |                    |
| <b>Combination</b> | 29/137(21.2)            | 0.568        | 1.247(0.585,2.661)  |                    | 0/10(0)         | 0.729        |                    |
| <b>Only ICI</b>    | 18/121(14.9)            | 0.814        | 0.898(0.366,2.203)  |                    | 7/11(63.6)      | <b>0.045</b> | 0.262(0.071,0.968) |
| <b>PPI</b>         | 44/98(44.9)             | <b>0.016</b> | 2.954(1.227,7.108)  | <b>0.010</b>       | 2/7(28.6)       | 0.582        | 0.624(0.117,3.341) |
|                    |                         |              |                     | 3.620(1.357,9.658) |                 |              |                    |
| <b>NSAIDs</b>      | 24/98(24.5)             | <b>0.044</b> | 3.676(1.035,13.050) | 0.105              | 0/7(0)          | 0.998        | <0.001             |
| <b>Baseline</b>    | <b>Scr</b> 1.0(0.8,1.2) | 0.541        | 1.306(0.555,3.072)  |                    | 0.80(0.63,1.18) | 0.512        | 0.498(0.062,4.017) |
| <b>level</b>       |                         |              |                     |                    |                 |              |                    |
| <b>Extra renal</b> | 46/130(35.4)            | <b>0.082</b> | 1.765(0.931,3.345)  | 0.452              | 3/11(30.0)      | 0.940        | 0.948(0.237,3.792) |
| <b>irAEs</b>       |                         |              |                     |                    |                 |              |                    |

Abbreviations: irAE: immune related adverse events; ICI: immune checkpoint inhibitor; CKD: chronic kidney disease; CHD: coronary heart disease; PPI: proton pump inhibitor; NSAIDs: non-steroidal anti-inflammatory drugs.

**Supplemental Table S8.** Risk factors for ICI-associated kidney IRAEs with glomerular disease and systematic disease

|                             | Univariate logistic analysis |                  |                      | Multiple logistic analysis |                    | Univariate logistic analysis      |         |                    |
|-----------------------------|------------------------------|------------------|----------------------|----------------------------|--------------------|-----------------------------------|---------|--------------------|
|                             | Glomerular<br>(n=46)         | P<br>value       | OR (95 CI)           | P<br>value                 | OR (95 CI)         | Systematic<br>disease (n =<br>39) | P value | OR (95 CI)         |
| <b>Age</b>                  | 61(46,69)                    | <b>&lt;0.001</b> | 0.954(0.930,0.979)   | <b>0.001</b>               | 0.933(0.895,0.973) | 65(55,71)                         | 0.518   | 0.991(0.965,1.018) |
| <b>Male</b>                 | 35/46(76.1)                  | 0.260            | 1.537(0.728,3.246)   |                            |                    | 28/39(71.8)                       | 0.702   | 1.161(0.540,2.493) |
| <b>Comorbidities</b>        |                              |                  |                      |                            |                    |                                   |         |                    |
| <b>Hypertension</b>         | 13/30(43.3)                  | 0.537            | 0.777(0.349,1.732)   |                            |                    | 9/24(37.5)                        | 0.249   | 0.591(0.242,1.444) |
| <b>Diabetics</b>            | 7/30(23.3)                   | 0.307            | 1.659(0.628,4.381)   |                            |                    | 3/25(12.0)                        | 0.473   | 0.625(0.173,2.258) |
| <b>CKD</b>                  | 6/30(20.0)                   | 0.423            | 0.571(0.253,1.780)   |                            |                    | 9/25(36.0)                        | 0.208   | 1.793(0.723,4.446) |
| <b>CHD</b>                  | 3/30(10.0)                   | 0.906            | 1.083(0.286,5.107)   |                            |                    | 2/25(8.0)                         | 0.790   | 0.809(0.171,3.829) |
| <b>Tumor type</b>           |                              | <b>&lt;0.001</b> |                      | 0.052                      |                    |                                   | 0.508   |                    |
| <b>Melanoma</b>             | 8/46(17.4)                   |                  |                      |                            |                    | 20/39(51.3)                       |         |                    |
| <b>Lung cancer</b>          | 6/46(13.0)                   | 0.766            | 1.185(0.388,3.618)   | 0.181                      |                    | 6/39(15.4)                        | 0.069   | 0.402(0.150,1.074) |
| <b>Renal cancer</b>         | 9/46(19.6)                   | <b>0.001</b>     | 7.406(2.394,22.916)  | 0.042                      |                    | 4/39(10.3)                        | 0.697   | 0.788(0.238,2.612) |
|                             | 7/46(15.2)                   | <0.001           | 17.281(4.146,72.038) | 0.086                      |                    | 0/39(0)                           | 0.999   | <0.001             |
| <b>Hematological cancer</b> |                              |                  |                      |                            |                    |                                   |         |                    |
| <b>Others</b>               | 16/46(34.8)                  | <b>0.001</b>     | 5.267(2.043,13.578)  | 0.517                      |                    | 9/39(23.1)                        | 0/650   | 0.815(0.337,1.971) |
| <b>ICI type</b>             |                              | 0.771            |                      |                            |                    |                                   |         |                    |

**Supplemental Table S8.** (continued)

|                    |                            |              |                     |       |                 |              |                     |
|--------------------|----------------------------|--------------|---------------------|-------|-----------------|--------------|---------------------|
| <b>PD-1</b>        | 31/42(73.8)                |              |                     |       | 22/37(59.5)     | 0.488        |                     |
| <b>PD-L1</b>       | 2/42(4.8)                  | 0.931        | 0.926(0.163,5.251)  |       | 2/37(5.4)       | 0.921        | 1.091(0.196,6.067)  |
| <b>CTLA-4</b>      | 2/42(4.8)                  | 0.769        | 1.268(0.260,6.176)  |       | 5/37(13.5)      | 0.821        | 0.832(0.168,4.113)  |
| <b>Combination</b> | 7/42(16.7)                 | 0.685        | 0.643(0.076,5.417)  |       | 8/37(21.6)      | 0.451        | 2.045(0.318,13.159) |
| <b>Only ICI</b>    | 33/34(97.1)                | <b>0.065</b> | 6.818(0.891,52.201) | 0.060 | 25/29(86.2)     | 0.913        | 1.066(0.338,3.360)  |
| <b>PPI</b>         | 6/26(23.1)                 | <b>0.078</b> | 0.411(0.153,1.104)  | 0.275 | 3/16(81.3)      | <b>0.096</b> | 0.330(0.089,1.219)  |
| <b>NSAIDs</b>      | 5/26(19.2)                 | 0.913        | 0.942(0.319,2.777)  |       | 2/16(87.5)      | 0.431        | 0.537(0.114,2.520)  |
| <b>Baseline</b>    | <b>Scr</b> 0.82(0.76,1.18) | 0.423        | 0.646(0.222,1.878)  |       | 1.00(0.80,1.32) | 0.679        | 1.229(0.464,3.254)  |
| <b>level</b>       |                            |              |                     |       |                 |              |                     |
| <b>Extra</b>       | <b>renal</b> 8/46(17.4)    | <b>0.026</b> | 0.391(0.171,0.896)  | 0.200 | 10/38(26.3)     | 0.484        | 0.754(0.342,1.663)  |
| <b>irAEs</b>       |                            |              |                     |       |                 |              |                     |

Abbreviations: irAE: immune related adverse events; ICI: immune checkpoint inhibitor; CKD: chronic kidney disease; CHD: coronary heart disease; PPI: proton pump inhibitor; NSAIDs: non-steroidal anti-inflammatory drugs.

**Supplemental Table S9.** Univariate and multivariable logistic analysis of factors with kidney function recovery in AKD patients

|                      | Univariate logistic analysis |                           |              | Multivariable logistic analysis |                                  |
|----------------------|------------------------------|---------------------------|--------------|---------------------------------|----------------------------------|
|                      | No recovery<br>(n=31)        | Renal recovery<br>(n=137) | P value      | OR (95%CI)                      | P value OR (95%IC)               |
| <b>Age</b>           | 63(52,69)                    | 68(62,74)                 | <b>0.012</b> | 1.044(1.010,1.080)              | <b>0.051</b> 1.046 (1.000,1.095) |
| <b>Male [n/N(%)]</b> | 25/31(80.6)                  | 89(65.0)                  | <b>0.097</b> | 0.445(0.171,1.159)              | 0.538                            |
| <b>Comorbidities</b> |                              |                           |              |                                 |                                  |
| <b>Hypertension</b>  | 6/19(31.6)                   | 49/95(51.6)               | 0.118        | 2.308(0.810,6.580)              |                                  |
| <b>Diabetics</b>     | 1/19(5.3)                    | 21/95(22.1)               | 0.123        | 5.108(0.644,40.528)             |                                  |
| <b>CKD</b>           | 6/19(31.6)                   | 20/95(21.1)               | 0.322        | 0.578(0.195,1.711)              |                                  |
| <b>CHD</b>           | 1/19(5.3)                    | 6/95(6.3)                 | 0.862        | 1.213(0.138,10.700)             |                                  |
| <b>Tumor type</b>    |                              |                           | 0.471        |                                 |                                  |
| <b>Melanoma</b>      | 14/31(45.2)                  | 46/137(33.6)              |              |                                 |                                  |
| <b>Lung cancer</b>   | 5/31(16.1)                   | 44/137(32.1)              | 0.080        | 2.678(0.890,8.059)              |                                  |
| <b>Renal cancer</b>  | 3/31(9.7)                    | 16/137(11.7)              | 0.489        | 1.623(0.412,6.391)              |                                  |
| <b>Hematological</b> | 1/31(3.2)                    | 4/137(2.9)                | 0.865        | 1.217(0.126,11.801)             |                                  |
| <b>cancer</b>        |                              |                           |              |                                 |                                  |
| <b>Others</b>        | 8/31(25.8)                   | 27/137(19.7)              | 0.958        | 1.027(0.382,2.765)              |                                  |
| <b>ICI type</b>      |                              |                           | 0.104        |                                 |                                  |
| <b>PD-1</b>          | 20/31(64.5)                  | 97/137(70.8)              |              |                                 |                                  |
| <b>PD-L1</b>         | 2/31(6.5)                    | 7/137(5.1)                | 0.697        | 0.722(0.139,3.733)              |                                  |
| <b>CTLA-4</b>        | 6/31(19.4)                   | 8/137(5.8)                | 0.030        | 0.275(0.086,0.879)              |                                  |



Supplemental Table S9. (continued)

|                                   |                 |                 |                  |                      |                  |                      |
|-----------------------------------|-----------------|-----------------|------------------|----------------------|------------------|----------------------|
| <b>Combination</b>                | 3/31(9.7)       | 25/137(18.2)    | 0.411            | 1.718(0.473,6.246)   |                  |                      |
| <b>Only ICI</b>                   | 21/24(87.5)     | 87/108(80.6)    | 0.429            | 0.592(0.161,2.172)   |                  |                      |
| <b>Interval time(d)</b>           | 147(30,267)     | 106(60,180)     | 0.523            | 0.999(0.997,1.001)   |                  |                      |
| <b>Baseline Scr</b>               | 1.02(0.85,1.22) | 1.00(0.80,1.18) | 0.487            | 0.650(0.193,2.189)   |                  |                      |
| <b>ATIN/AIN</b>                   | 12/31(38.7)     | 104/137(75.9)   | <b>&lt;0.001</b> | 4.990(2.193,11.352)  | <b>0.855</b>     |                      |
| <b>ATN</b>                        | 1/31(3.2)       | 7/137(5.1)      | 0.659            | 1.615(0.191,13.628)  |                  |                      |
| <b>Glomerular disease</b>         | 3/31(9/7)       | 24/137(17.5)    | 0.291            | 1.982 (0.557, 7.055) |                  |                      |
| <b>Systematic disease</b>         | 17/31(54.8)     | 11/137(8.0)     | <b>&lt;0.001</b> | 0.072(0.028,0.184)   | <b>&lt;0.001</b> | 0.119 (0.038,0.376)  |
| <b>Extra-renal irAE</b>           | 7/30(23.3)      | 44/135(32.6)    | 0.324            | 1.589(0.633,3.984)   |                  |                      |
| <b>AKD grade</b>                  |                 |                 | <b>0.051</b>     | 1.689(0.999,2.856)   | <b>0.177</b>     |                      |
| <b>AKD 1 grade</b>                | 7/30(23.3)      | 11/129(8.5)     |                  |                      |                  |                      |
| <b>AKD 2 grade</b>                | 5/30(16.7)      | 24/129(18.6)    |                  |                      |                  |                      |
| <b>AKD 3 grade</b>                | 18/30(60.0)     | 94/129(72.9)    |                  |                      |                  |                      |
| <b>corticosteroid</b>             | 25/31(80.6)     | 131/137(95.6)   | <b>0.007</b>     | 5.240(1.563,17.568)  | <b>0.007</b>     | 9.429 (1.823,48.779) |
| <b>Intravenous corticosteroid</b> | 11/28(39.3)     | 44/131(33.6)    | 0.566            | 0.782(0.337,1.812)   |                  |                      |
| <b>Pulse steroid therapy</b>      | 7/8(87.5)       | 23/33(69.7)     | 0.326            | 0.329(0.036,3.034)   |                  |                      |
| <b>Oral corticosteroid</b>        |                 |                 | 0.349            | 1.611(0.594,4.370)   |                  |                      |
| <b>Low-dose (&lt;0.5)</b>         | 4/16(25.0)      | 13/100(13.0)    |                  |                      |                  |                      |

**Supplemental Table S9.** (continued)

|                                |             |               |              |                     |                  |                     |
|--------------------------------|-------------|---------------|--------------|---------------------|------------------|---------------------|
| <b>Moderate-dose (0.5-1.0)</b> | 10/16(62.5) | 73/100(73.0)  |              |                     |                  |                     |
| <b>High-dose (&gt;1.0)</b>     | 2/16(12.5)  | 14/100(14.0)  |              |                     |                  |                     |
| <b>immunosuppressants</b>      | 9/28(32.1)  | 25/133(18.8)  | 0.121        | 0.489(0.198,1.207)  |                  |                     |
| <b>Discontinued ICI</b>        | 21/25(84.0) | 121/125(96.8) | <b>0.019</b> | 5.762(1.336,24.843) |                  |                     |
| <b>RRT</b>                     | 17/27(63.0) | 17/135(12.6)  | <b>0.001</b> | 0.085(0.033,0.215)  | <b>&lt;0.001</b> | 0.111 (0.033,0.374) |

Abbreviations: IRAE: immune related adverse events; ICI: immune checkpoint inhibitor; CKD: chronic kidney disease; CHD: coronary heart disease; PPI: proton pump inhibitor; NSAIDs: non-steroidal anti-inflammatory drugs; SCr: serum creatinine; AKD: acute kidney disease; RRT: renal replacement treatment.

**Supplemental Table S10.** Univariate and multivariable logistic analysis of factors with tumor progression and death

|                             | Univariate logistic analysis |         |                     | Multiple logistic analysis |           | Univariate logistic analysis |              |                     | Multiple logistic analysis |                       |
|-----------------------------|------------------------------|---------|---------------------|----------------------------|-----------|------------------------------|--------------|---------------------|----------------------------|-----------------------|
|                             | PD (n=41)                    | P value | OR(95%CI)           | P value                    | OR(95%CI) | Death (n=28)                 | P value      | OR(95%CI)           | P value                    | OR(95%CI)             |
| <b>Age</b>                  | 64(55,73)                    | 0.184   | 0.978(0.947,1.011)  |                            |           | 64(53,72)                    | 0.399        | 0.987(0.957,1.018)  |                            |                       |
| <b>Male [n/N(%)]</b>        | 30/41(73.2)                  | 0.992   | 1.005(0.399,2.530)  |                            |           | 24/28(85.7)                  | <b>0.045</b> | 3.136(1.026,9.583)  | 0.213                      |                       |
| <b>Comorbidities</b>        |                              |         |                     |                            |           |                              |              |                     |                            |                       |
| <b>Hypertension</b>         | 16/35(45.7)                  | 0.376   | 0.667(0.272,1.636)  |                            |           | 11/22(50.0)                  | 0.883        | 1.073(0.420,2.741)  |                            |                       |
| <b>Diabetics</b>            | 6/35(17.1)                   | 0.673   | 0.782(0.249,2.458)  |                            |           | 6/22(27.3)                   | 0.542        | 1.396(0.477,4.081)  |                            |                       |
| <b>CKD</b>                  | 9/35(25.7)                   | 0.828   | 0.894(0.326,2.453)  |                            |           | 8/22(36.4)                   | 0.144        | 2.217(0.773,5.855)  |                            |                       |
| <b>CHD</b>                  | 2/35(5.7)                    | 0.833   | 1.242(0.166,9.299)  |                            |           | 2/22(9.1)                    | 0.747        | 1.317(0.247,7.021)  |                            |                       |
| <b>Tumor type</b>           |                              | 0.464   |                     |                            |           |                              | <b>0.063</b> |                     | <b>0.051</b>               |                       |
| <b>Melanoma</b>             | 10/41(24.4)                  |         |                     |                            |           | 10/28(35.7)                  |              |                     |                            |                       |
| <b>Lung cancer</b>          | 10/41(24.4)                  | 0.592   | 1.357(0.445,4.142)  |                            |           | 2/28(7.1)                    | 0.037        | 0.186(0.039,0.902)  | 0.082                      | 0.230(0.044,1.202)    |
| <b>Renal cancer</b>         | 6/41(14.6)                   | 0.595   | 1.425(0.386,5.262)  |                            |           | 6/28(21.4)                   | 0.349        | 1.757(0.540,5.719)  | 0.674                      | 1.343(0.339,5.321)    |
| <b>Hematological cancer</b> | 5/41(12.2)                   | 0.092   | 4.750(0.778,29.019) |                            |           | 3/28(10.7)                   | 0.182        | 3.075(0.591,15.993) | <b>0.047</b>               | 13.342(1.032,172.512) |
| <b>Others</b>               | 10/41(24.4)                  | 0.215   | 2.111(0.647,6.885)  |                            |           | 7/28(25.0)                   | 0.888        | 0.926(0.317,2.706)  | 0.359                      | 0.547(0.151,1.984)    |
| <b>ICI type</b>             |                              | 0.621   |                     |                            |           |                              | 0.658        |                     |                            |                       |
| <b>PD-1</b>                 | 31/41(75.6)                  |         |                     |                            |           | 19/28(67.9)                  |              |                     |                            |                       |

**Supplemental Table S10.** (continued)

|                                   |                 |              |                     |       |                   |                  |                     |              |                    |
|-----------------------------------|-----------------|--------------|---------------------|-------|-------------------|------------------|---------------------|--------------|--------------------|
| <b>PD-L1</b>                      | 4/41(9.8)       | 0.291        | 2.581(0.444,15.015) |       | 2/28(7.1)         | 0.526            | 1.719(0.322,9.170)  |              |                    |
| <b>CTLA-4</b>                     | 2/41(4.9)       | 0.804        | 1.290(0.172,9.681)  |       | 3/28(10.7)        | 0.280            | 2.211(0.524,9.320)  |              |                    |
| <b>Combination</b>                | 4/41(9.8)       | 0.505        | 0.645(0.178,2.340)  |       | 4/28(14.3)        | 0.856            | 0.897(0.278,2.890)  |              |                    |
| <b>Only ICI</b>                   | 30/39(76.9)     | 0.313        | 0.569(0.191,1.170)  |       | 21/25(84.0)       | 0.984            | 1.012(0.306,3.346)  |              |                    |
| <b>Interval time(d)</b>           | 102(60,180)     | 0.647        | 0.999(0.996,1.003)  |       | 68(33,125)        | 0.197            | 0.998(0.995,1.001)  |              |                    |
| <b>Baseline Scr</b>               | 0.90(0.79,1.30) | 0.743        | 1.178(0.443,3.137)  |       | 1.01(0.80,1.40)   | 0.360            | 1.735(0.533,5.649)  |              |                    |
| <b>ATIN/AIN</b>                   | 19/41(46.3)     | <b>0.099</b> | 0.497(0.216,1.145)  | 0.405 | 7/28(25.0)        | <b>&lt;0.001</b> | 0.180(0.071,0.455)  | <b>0.001</b> | 0.164(0.057,0.473) |
| <b>ATN</b>                        | 4/41(9.8)       | 0.474        | 1.766(0.372,8.375)  |       | 3/28(10.7)        | 0.283            | 2.177(0.527,8.997)  |              |                    |
| <b>Glomerular disease</b>         | 17/41(41.5)     | <b>0.021</b> | 2.975(1.176,7.527)  | 0.021 | 2.975(1.176,7.59) | 0.275            | 1.642(0.674,4.003)  |              |                    |
|                                   |                 |              |                     | 27)   |                   |                  |                     |              |                    |
| <b>Systematic disease</b>         | 6/41(14.6)      | 0.223        | 0.514(0.176,1.499)  |       | 11/28(39.3)       | <b>0.011</b>     | 3.123(1.293,7.539)  | 0.335        |                    |
| <b>Extra-renal irAE</b>           | 9/40(22.5)      | 0.553        | 0.747(0.284, 1.960) |       | 6/28(21.4)        | 0.498            | 0.712(0.267,1.899)  |              |                    |
| <b>AKD grade</b>                  |                 | 0.303        | 0.730(0.402,1.328)  |       |                   | 0.739            | 1.114(0.590,2.105)  |              |                    |
| <b>AKD 1 grade</b>                | 7/37(18.9)      |              |                     |       | 4/26(15.4)        |                  |                     |              |                    |
| <b>AKD 2 grade</b>                | 7/37(18.9)      |              |                     |       | 2/26(7.1)         |                  |                     |              |                    |
| <b>AKD 3 grade</b>                | 23/37(62.2)     |              |                     |       | 20/26(76.9)       |                  |                     |              |                    |
| <b>corticosteroid</b>             | 37/41(90.2)     | 0.265        | 0.370(0.064,2.129)  |       | 26/28(92.9)       | 0.954            | 1.048(0.217,5.069)  |              |                    |
| <b>Intravenous corticosteroid</b> | 10/38(26.3)     | 0.278        | 0.602(0.240,1.507)  |       | 8/27(29.6)        | 0.950            | 0.972(0.392,2.408)  |              |                    |
| <b>Pulse steroid therapy</b>      | 5/7(71.4)       | 0.858        | 0.833(0.114,6.111)  |       | 7/8(87.5)         | 0.301            | 3.294(0.345,31.490) |              |                    |

**Supplemental Table S10.** (continued)

|                                       |             |       |                     |  |             |              |                           |
|---------------------------------------|-------------|-------|---------------------|--|-------------|--------------|---------------------------|
| <b>Oral corticosteroid</b>            |             | 0.420 | 1.495(0.562,3.974)  |  | 0.229       |              |                           |
| <b>Low-dose (&lt;0.5)</b>             | 2/30(6.7)   |       |                     |  | 1/22(4.5)   |              |                           |
| <b>Moderate-dose</b>                  | 23/30(76.7) |       |                     |  | 16/22(72.7) | 0.108        | 0.150(0.015,1.518)        |
| <b>(0.5-1.0)</b>                      |             |       |                     |  |             |              |                           |
| <b>High-dose (&gt;1.0)</b>            | 5/30(16.7)  |       |                     |  | 5/22(22.7)  | 0.219        | 0.465(0.137,1.579)        |
| <b>immunosuppressants</b>             | 12/41(29.3) | 0.677 | 0.828(0.340,2.015)  |  | 7/27(25.9)  | 0.705        | 1.202(0.464,3.113)        |
| <b>Corticosteroid or</b>              | 37/41(90.2) | 0.134 | 5.514(0.592,51.368) |  | 26/28(92.9) | 0.935        | 1.068(0.218,5.236)        |
| <b>immunosuppressants</b>             |             |       |                     |  |             |              |                           |
| <b>Discontinued ICI</b>               | 36/37(97.3) | 0.289 | 0.299(0.032,2.793)  |  | 26/28(92.9) | 0.596        | 1.564(0.299,8.188)        |
| <b>RRT</b>                            | 5/38(13.2)  | 0.331 | 0.565(0.178,1.788)  |  | 8/27(29.6)  | <b>0.091</b> | 2.266(0.878,5.848) 0.339  |
| <b>No recovery of kidney function</b> | 6/31(80.6)  | 0.487 | 1.584(0.434,5.787)  |  | 8/24(33.3)  | <b>0.005</b> | 4.455(1.554,12.767) 0.053 |

Abbreviations: IRAE: immune related adverse events; ICI: immune checkpoint inhibitor; CKD: chronic kidney disease; CHD: coronary heart disease; SCr: serum creatinine; AKD: acute kidney disease; RRT: renal replacement treatment.
